# Supplementary material for: Multiomics profiling of urothelial carcinoma in situ reveals CIS-specific gene signature and immune characteristics
Source: PubMed Central journal article supplement — iScience. 2024 Feb 9;27(3):109179. doi: 10.1016/j.isci.2024.109179 (PMC10910238; doi:10.1016/j.isci.2024.109179), 2024-02-09
Supplement: mmc1.pdf [file mmc1.pdf]

**Supplemental information**

**Multionics profiling of urothelial carcinoma**

***in situ* reveals CIS-specific gene signature**

**and immune characteristics**

**Meenakshi Anurag, Trine Strandgaard, Sung Han Kim, Yongchao Dou, Eva Comperat, Hikmat Al-Ahmadie, Brant A. Inman, Ann Taber, Iver Nordentoft, Jørgen Bjerggaard Jensen, Lars Dyrskjøt, and Seth P. Lerner**

A)

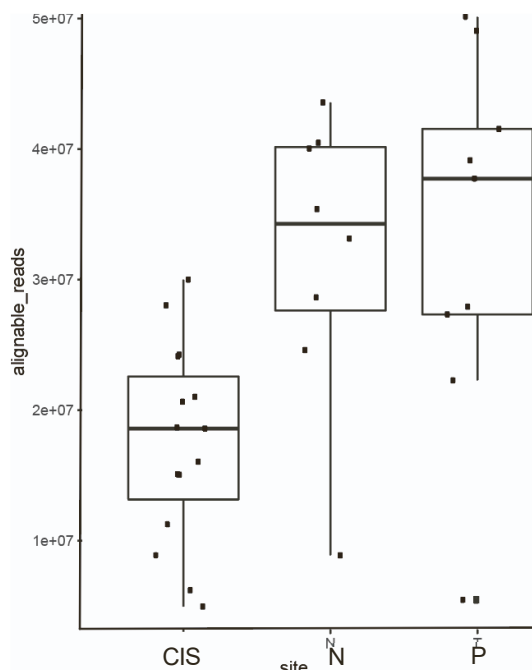

B)

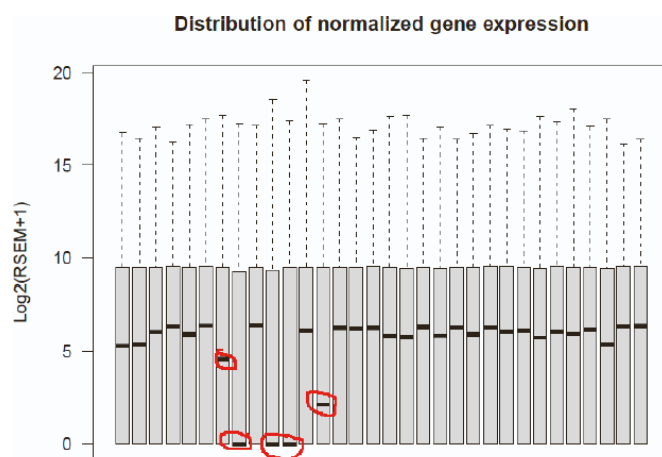

C)

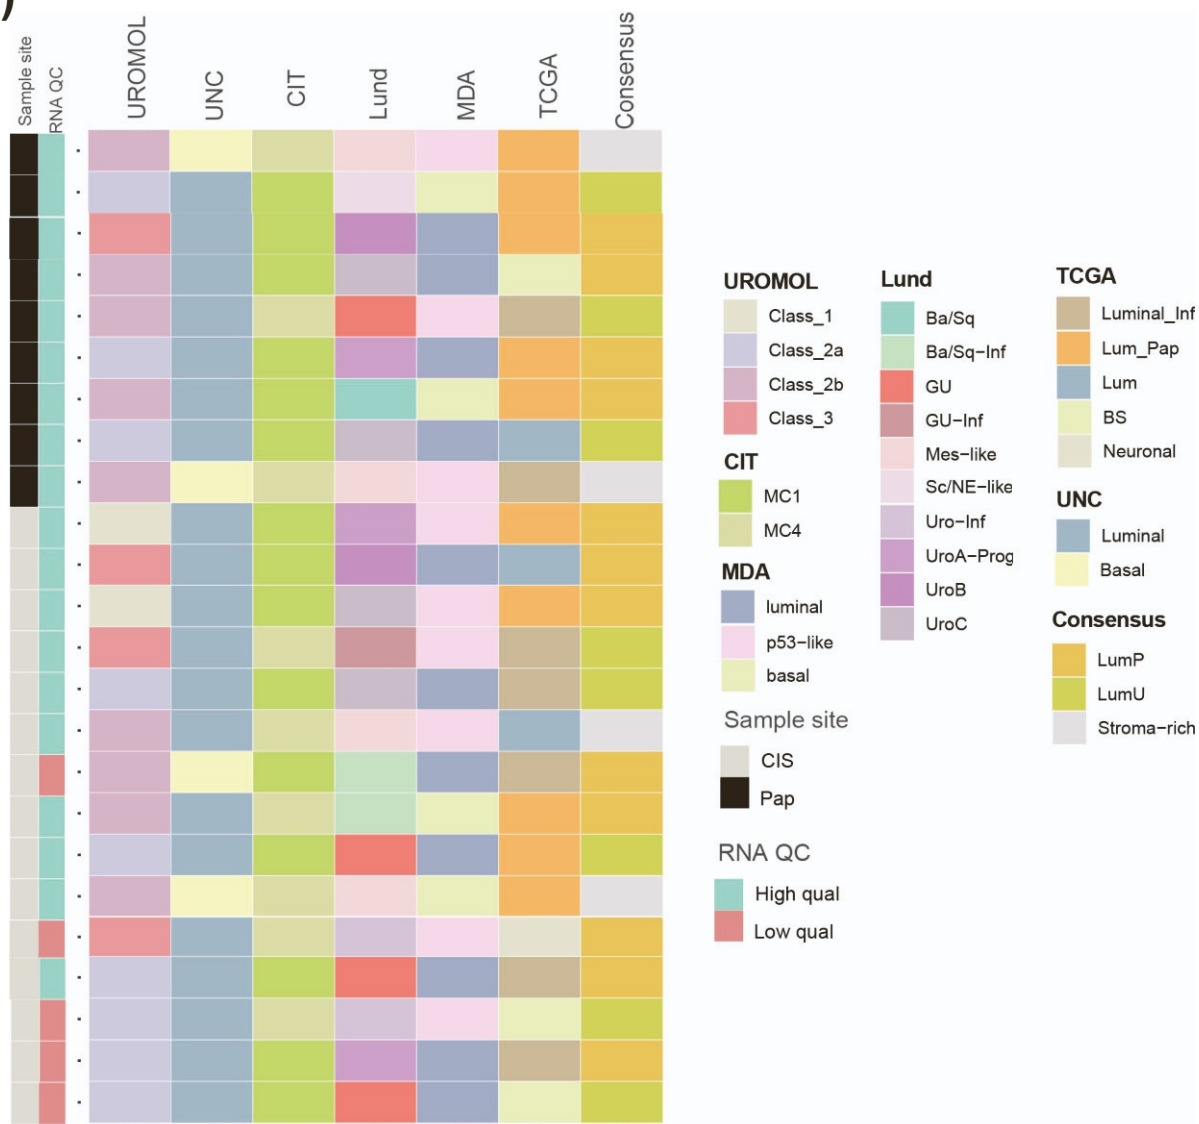

A)

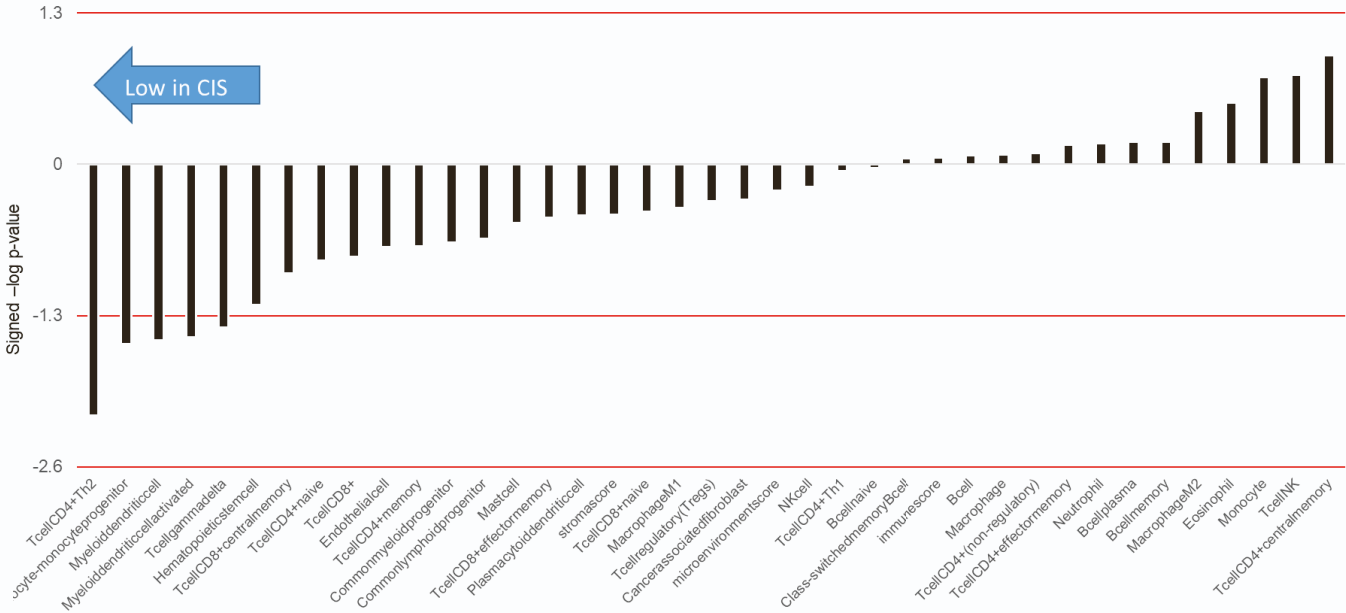

B) Enrichment plot: Notch signaling pathway

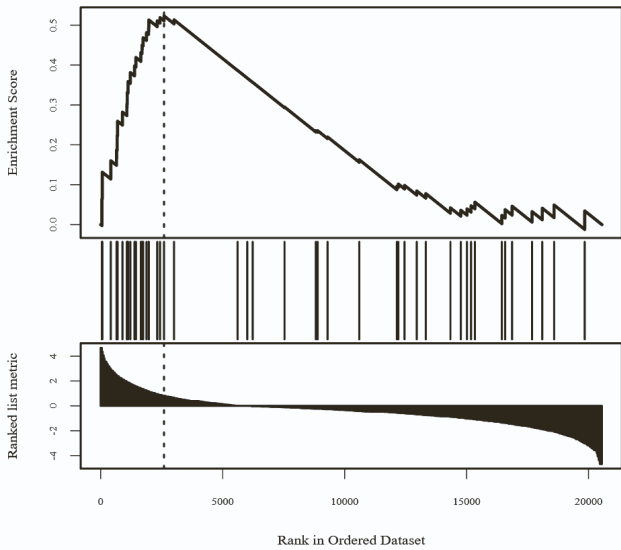

C) Enrichment plot: Lysine degradation

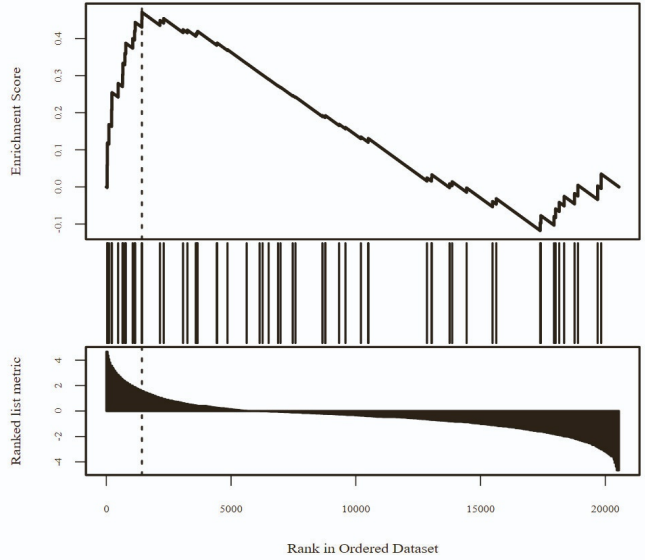

**A)**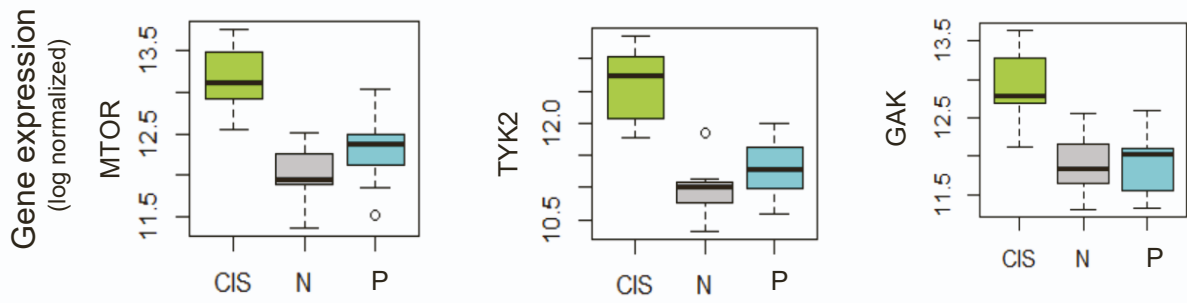**Fig S3****B)**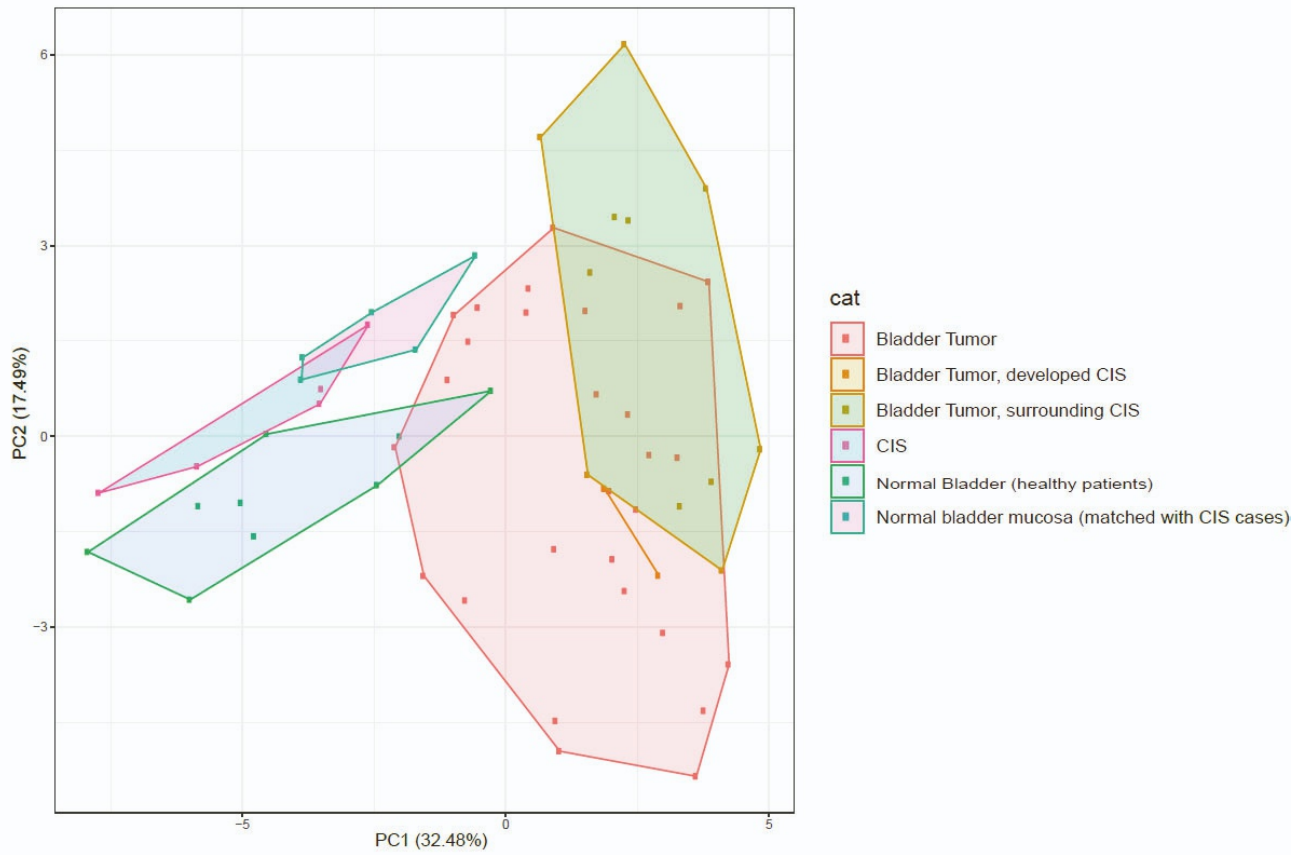**C)**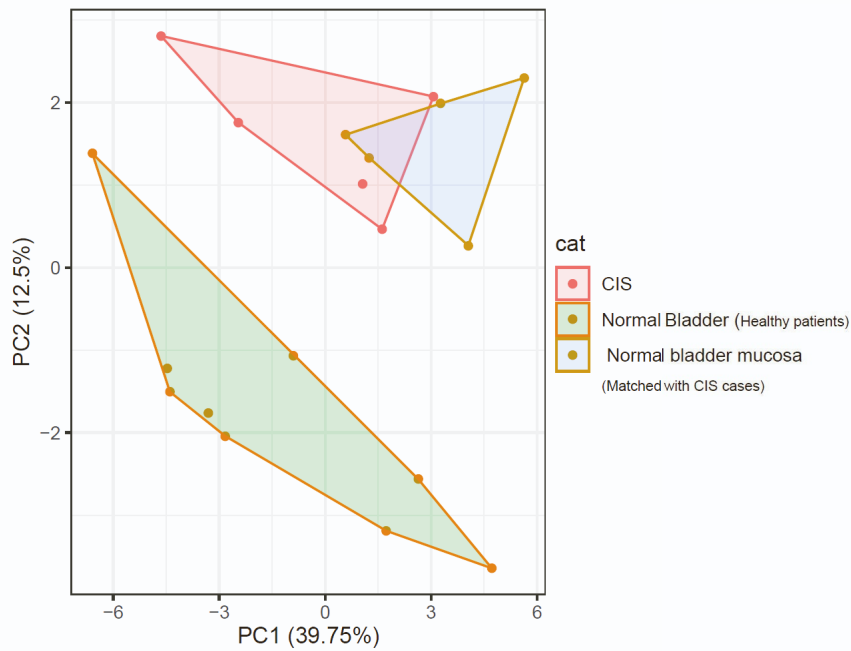

**Fig S4.**

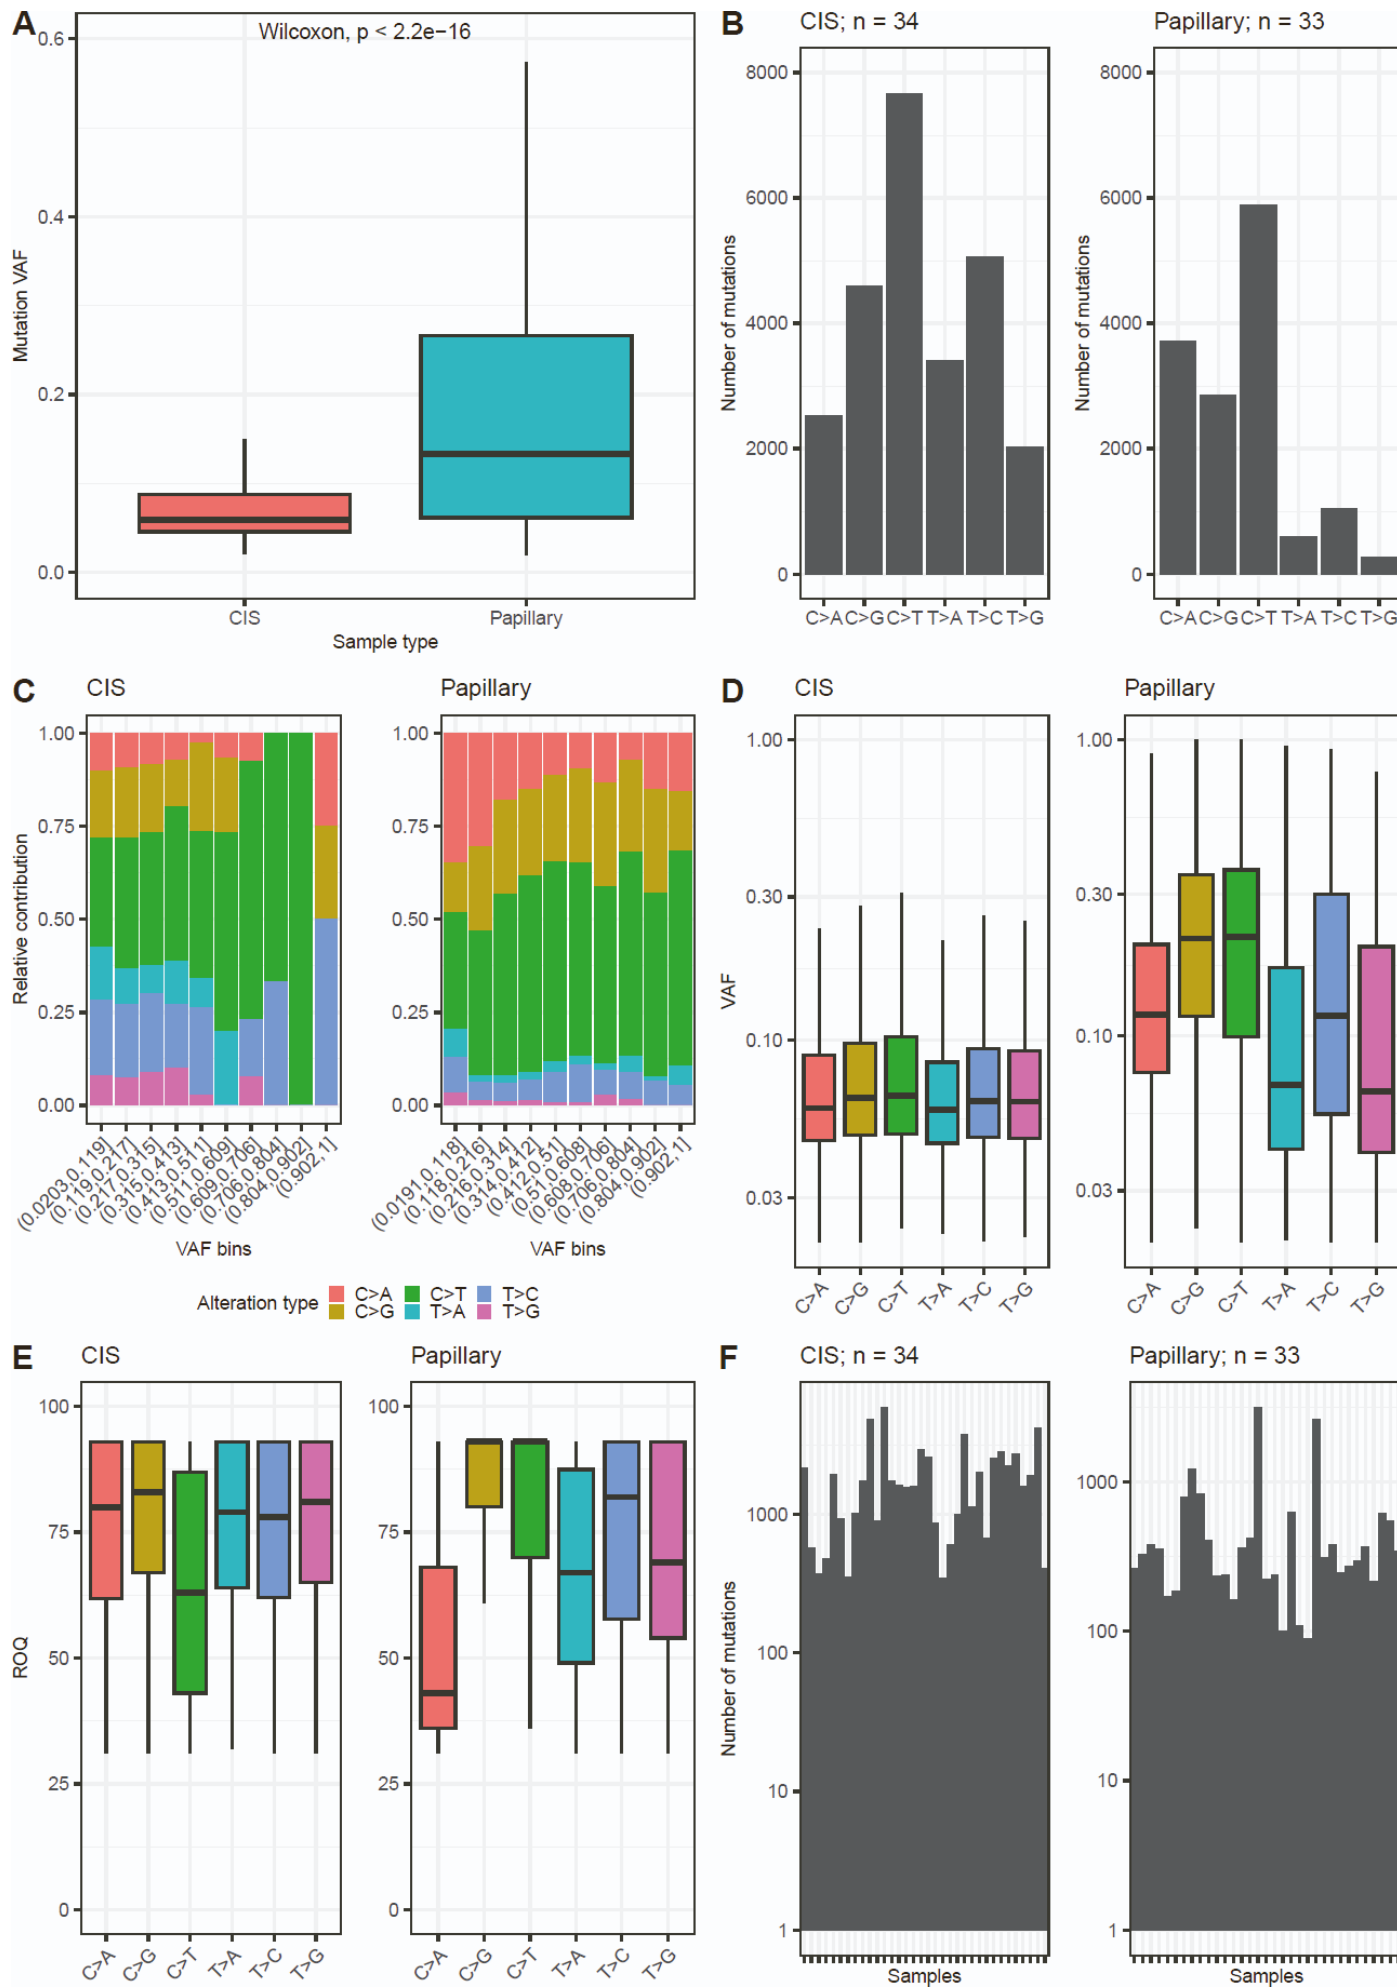

Fig S5

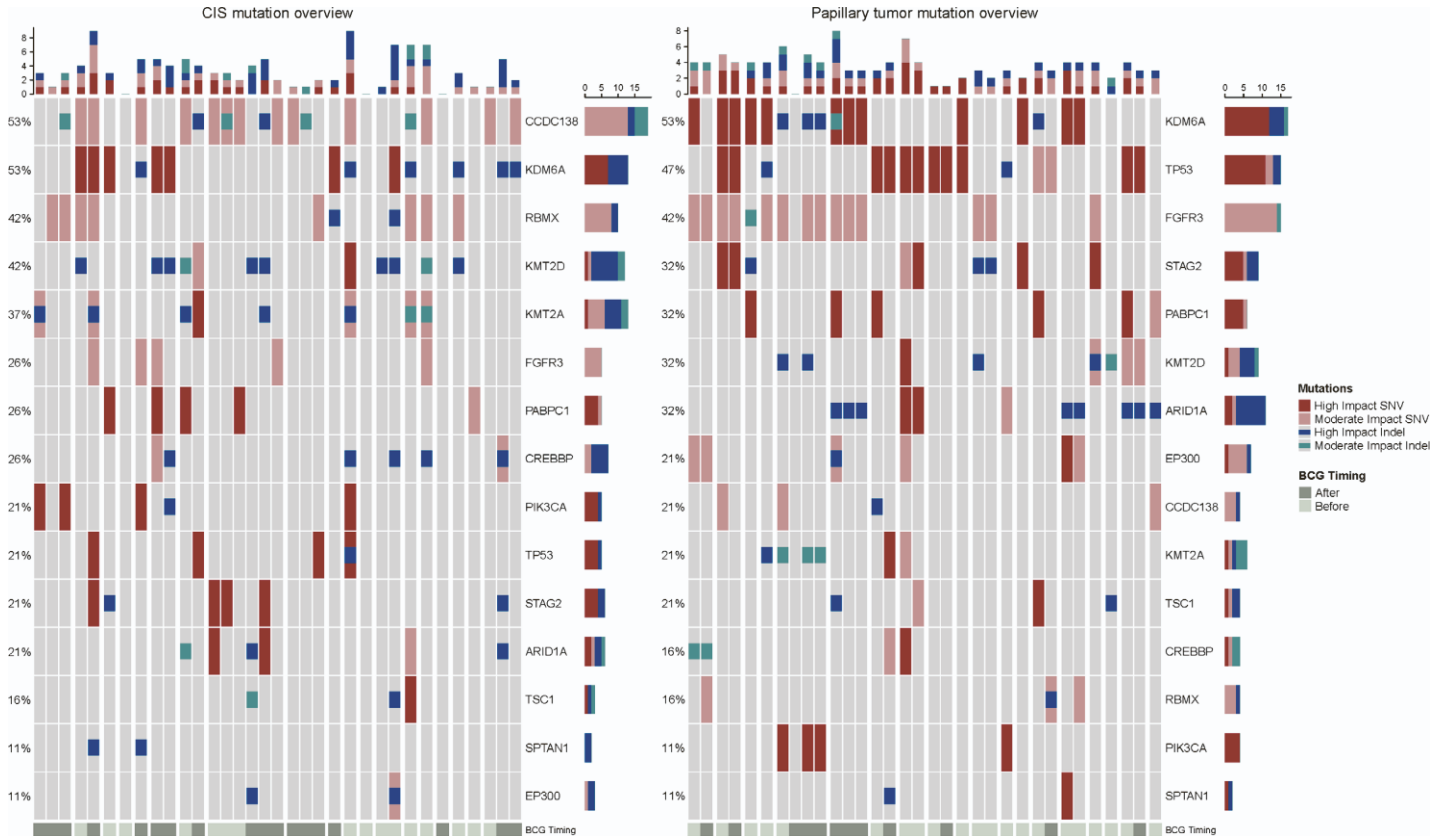

Fig S6.

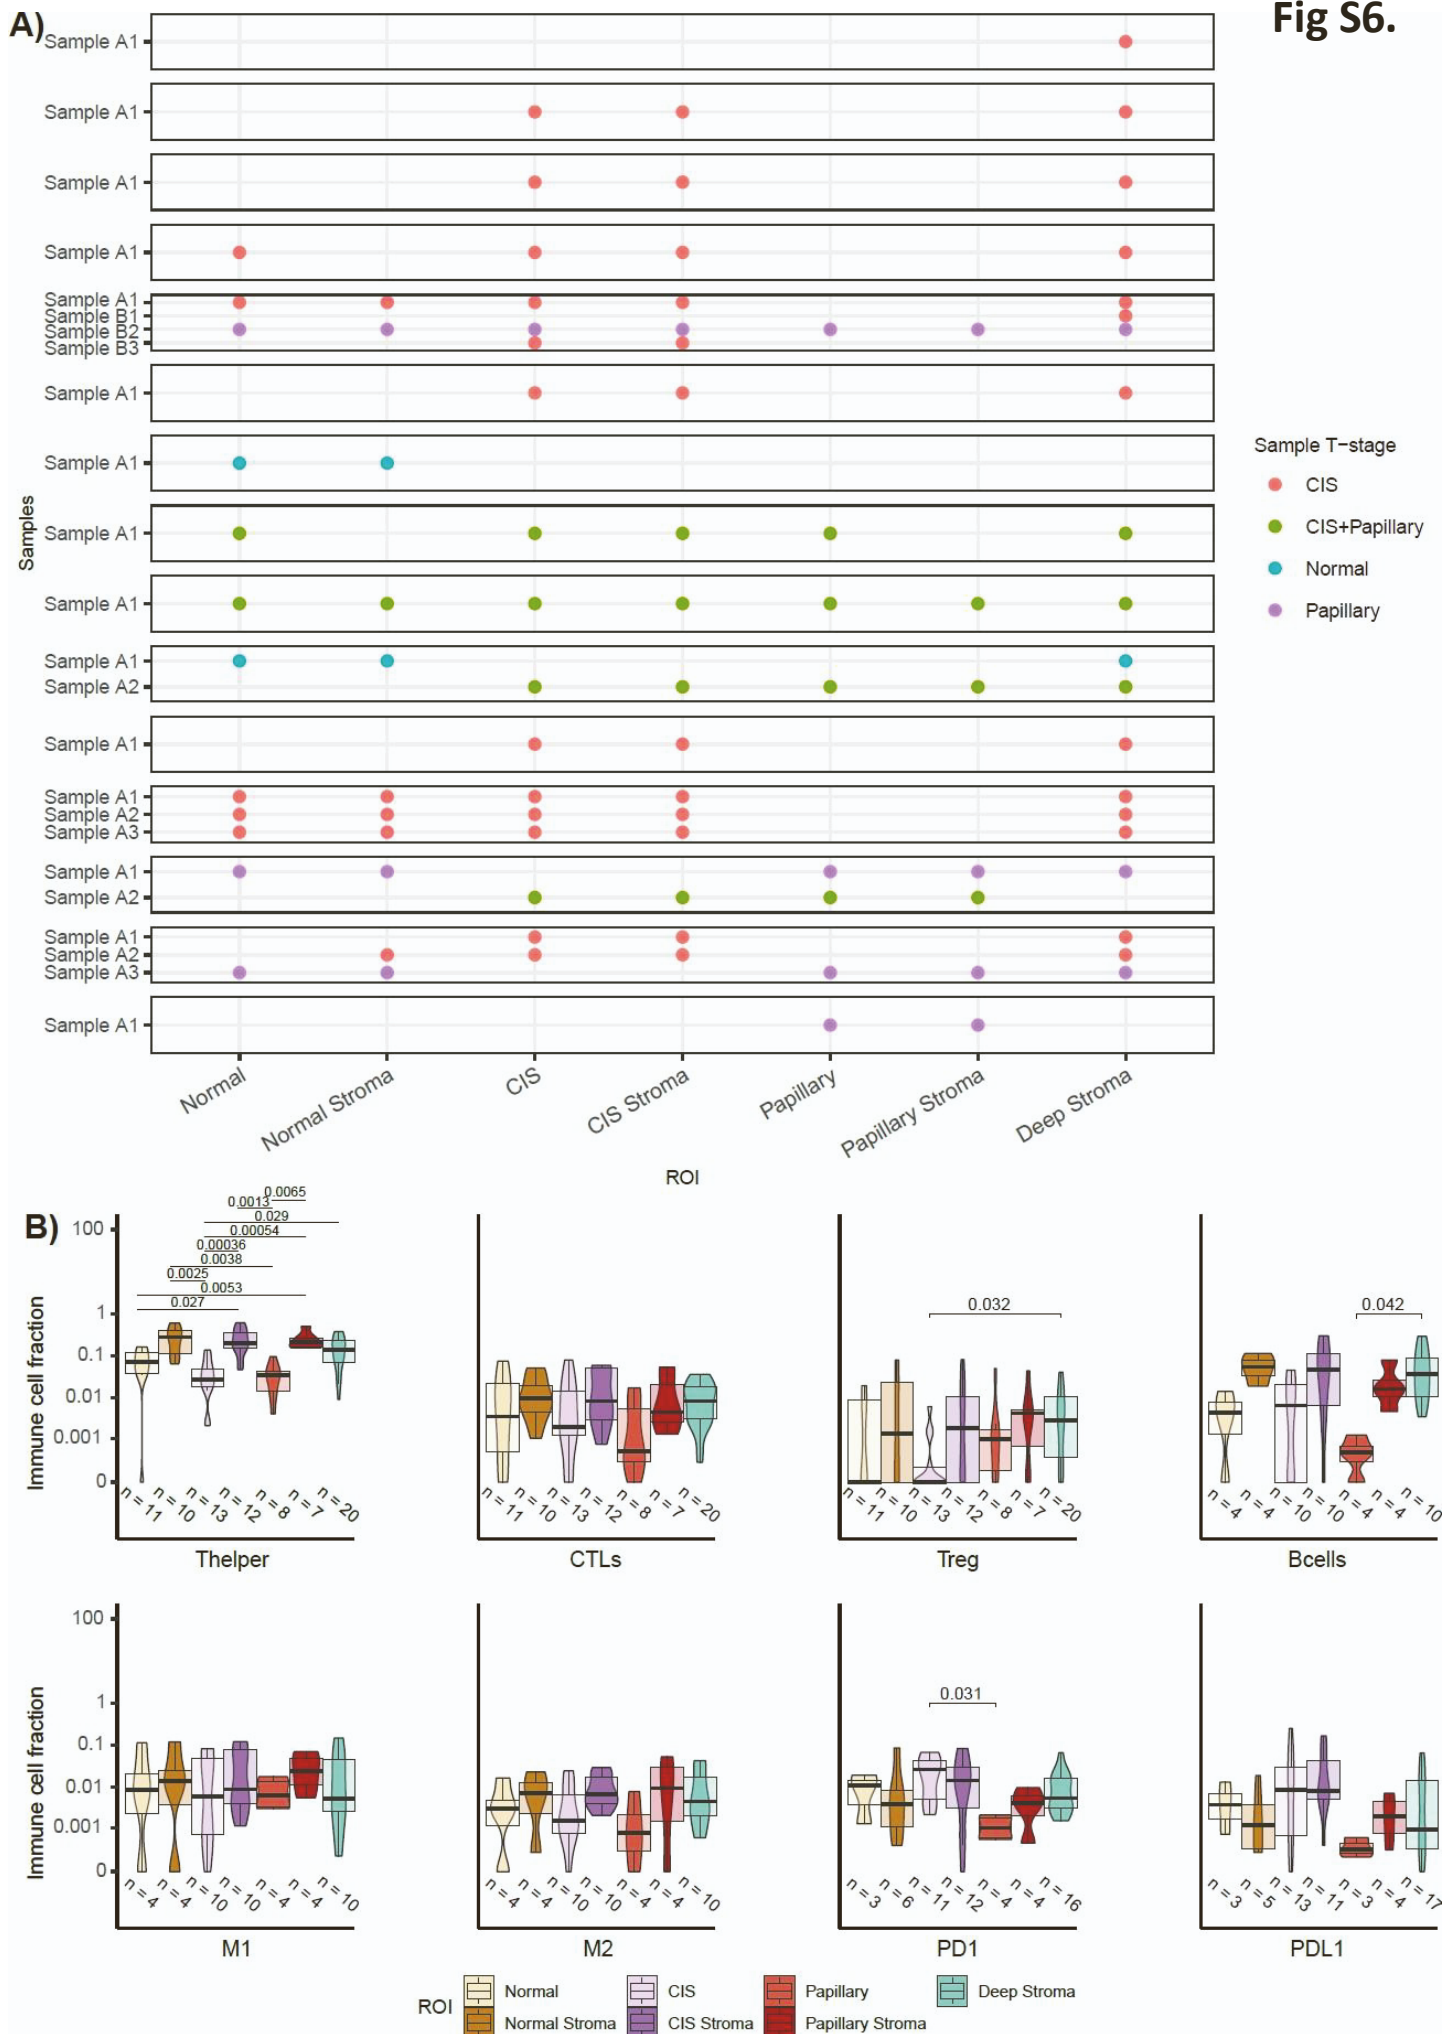

## Supplementary table and figure legends.

**Table S1.** Gene expression matrix of 24 samples from Cohort A. This table contains upper quartile normalized RSEM values median centered by gene.

**Figure S1. RNAseq data quality and sample subtypes.** A) Boxplot showing alignable number of reads by sample site- CIS, Normal (N) and Papillary tumors (P). B) Plot showing distribution of normalized gene expression across all samples included in the study. C) Heatmap showing different subtype classifications for the CIS and tumor samples. The sample site and RNA-based sample quality is shown as rows.

**Figure S2. Cell type and gene enrichment score.** A) Cell type (xCell) enrichment score for cohort A. Y-axis represents signed log p-value of comparison of CIS and papillary tumors. B-C) GSEA enrichment plot for Notch signaling and Lysine degradation pathways.

**Figure S3. CIS genes signature** A) Boxplot showing MTOR, TYK2 and GAK RNA levels across CIS, papillary (P) and Normal (N) samples. B) PCA plot of 36 (out of 46) CIS signature genes from GSE3167 including all samples. C) PCA plot of CIS signature genes across CIS, match normal bladder mucosa samples and normal bladder samples from healthy patients.

**Figure S4: CIS and papillary mutation characteristics.** A) Mutation VAF for alterations in CIS and papillary tumors (Wilcoxon rank sum test). B) The number of mutations of six alteration types in all CIS (left) or all papillary (right) samples. C) The relative distribution of the six alteration types in VAF bins for CIS samples (left) and papillary tumor samples (right). D) The VAF of mutations of the six alteration types measured in CIS samples (left) and papillary tumor samples (right). E) The ROQ of called mutations of the six alteration types measured in CIS samples (left) and papillary tumor samples (right). F) The total number of alterations in all samples of CIS (left) or papillary tumor (right) origin.

**Figure S5: Mutational landscape of CIS and papillary tumor samples separated** (moderate and high impact SNVs and indels). Columns correspond to unique samples. Groups of columns correspond to all analyzed samples from a single patient. Top: The number of the four mutation types in every sample. Middle: Oncoplot showing the four mutation types in selected genes, sorted by mutation frequency across patients. Frequencies of patients with mutations in the given gene are indicated to the left. Bars to the right indicate the numbers of the different mutation types within each gene across the samples in the cohort. Bottom: sample information. BCG Timing: sample timing in relation to BCG treatment.

**Figure S6: mIF and IHC sample overview and stromal compartments.** A) Overview of tissue types and ROIs. From each patient, samples are noted. Letters indicate different clinical visits followed by the



sample number from the visit in question. Colored circles indicate the sample T-stage. The different ROIs annotated in every sample are shown. B) Immune cell fractions. The fractions of immune cell types in all epithelial and stromal regions of interest. Statistically significant adjusted  $p$ -values are indicated (Wilcoxon rank sum test).
